# Supplementary material for: Single Sustained Inflation followed by Ventilation Leads to Rapid Cardiorespiratory Recovery but Causes Cerebral Vascular Leakage in Asphyxiated Near-Term Lambs
Source: PubMed Central journal article supplement (PMC4713062; doi:10.1371/journal.pone.0146574), 2016-01-14
Supplement: pone.0146574.s001.pdf [file pone.0146574.s001.pdf]

Table S1. Mean carotid blood flow (mL/kg/min) of individual animals in multiple SI, single SI and no SI groups from onset of ventilation.

| time (min) | multiple SI |       |       |       |       |       |       |      | single SI |       |       |       |       |       |       |      | no SI |       |       |       |       |       |       |      |
|------------|-------------|-------|-------|-------|-------|-------|-------|------|-----------|-------|-------|-------|-------|-------|-------|------|-------|-------|-------|-------|-------|-------|-------|------|
|            | 1           | 2     | 3     | 4     | 5     | 6     | mean  | SEM  | 1         | 2     | 3     | 4     | 5     | 6     | mean  | SEM  | 1     | 2     | 3     | 4     | 5     | 6     | mean  | SEM  |
| BV         | 22.04       | 7.65  | 8.16  | 2.47  | 28.16 | 10.74 | 13.20 | 4.00 | 15.20     | 16.90 | 11.18 | 4.65  | 7.63  | 6.82  | 10.40 | 2.00 | 8.59  | 3.70  | 10.60 | 33.64 | 26.87 | 12.12 | 15.92 | 4.76 |
| 0.00       | 24.88       | 5.48  | 7.48  | 2.51  | 27.83 | 9.95  | 13.02 | 4.35 | 18.36     | 18.02 | 12.18 | 3.85  | 10.25 | 9.03  | 11.95 | 2.27 | 7.59  | 3.50  | 9.39  | 32.96 | 22.20 | 13.90 | 14.93 | 4.45 |
| 0.30       | 22.48       | 4.40  | 10.55 | 1.50  | 29.70 | 13.68 | 13.72 | 4.39 | 38.39     | 28.89 | 26.84 | 10.42 | 15.20 | 15.85 | 22.60 | 4.30 | 7.69  | 3.17  | 9.32  | 32.23 | 17.32 | 15.58 | 14.22 | 4.18 |
| 1.00       | 18.95       | 13.38 | 22.57 | 2.54  | 30.89 | 13.83 | 17.03 | 3.92 | 35.98     | 30.39 | 29.08 | 8.64  | 15.27 | 25.32 | 24.11 | 4.18 | 20.92 | 6.08  | 23.15 | 33.80 | 12.83 | 16.38 | 18.86 | 3.88 |
| 1.30       | 21.73       | 12.78 | 24.09 | 15.92 | 27.47 | 15.01 | 19.50 | 2.36 | 40.82     | 33.75 | 35.70 | 12.63 | 16.19 | 29.93 | 28.17 | 4.60 | 18.80 | 17.71 | 27.55 | 37.96 | 8.20  | 16.72 | 21.16 | 4.20 |
| 2.00       | 24.24       | 13.30 | 24.86 | 18.34 | 25.07 | 16.27 | 20.35 | 2.07 | 46.00     | 31.81 | 44.30 | 19.13 | 16.38 | 34.85 | 32.08 | 5.05 | 19.59 | 18.17 | 27.42 | 42.19 |       | 16.15 | 24.70 | 4.77 |
| 2.30       | 26.92       | 12.71 | 19.80 | 20.30 | 28.01 | 19.01 | 21.13 | 2.30 | 48.10     | 33.93 | 50.10 | 24.89 | 17.80 | 39.71 | 35.75 | 5.22 | 14.54 | 22.14 | 29.96 | 41.34 | 31.16 | 16.08 | 25.87 | 4.17 |
| 3.00       | 29.21       | 13.19 | 26.01 | 24.95 | 29.17 | 23.25 | 24.30 | 2.42 | 52.76     | 30.31 | 53.71 | 28.86 | 18.70 | 47.87 | 38.70 | 5.98 | 9.03  | 24.26 | 32.65 | 38.63 | 31.14 | 16.05 | 25.29 | 4.54 |
| 3.30       | 30.76       | 12.92 | 18.56 | 29.22 | 30.16 | 25.73 | 24.56 | 2.97 | 56.83     | 28.75 | 59.55 | 29.41 | 20.57 | 51.50 | 41.10 | 6.85 | 10.93 | 27.63 | 36.65 | 40.90 | 30.14 | 16.74 | 27.16 | 4.69 |
| 4.00       | 34.32       | 12.75 | 14.67 | 32.81 | 29.77 | 29.21 | 25.59 | 3.84 | 59.15     | 26.84 | 58.20 | 28.68 | 21.48 | 52.55 | 41.15 | 7.05 | 7.30  | 30.19 | 38.30 | 40.54 | 29.66 | 18.14 | 27.36 | 5.14 |
| 4.30       | 35.22       | 12.53 | 12.86 | 34.89 | 29.10 | 32.11 | 26.12 | 4.34 | 60.25     | 25.56 | 57.78 | 28.54 | 22.80 | 51.88 | 41.14 | 7.06 | 37.86 | 31.84 | 39.14 | 39.55 | 27.38 | 19.78 | 32.59 | 3.22 |
| 5.00       | 34.72       | 12.35 | 10.68 | 36.07 | 29.63 | 33.91 | 26.23 | 4.74 | 60.02     | 24.44 | 55.56 | 27.28 | 23.07 | 53.25 | 40.60 | 7.09 | 33.15 | 33.52 | 39.26 | 38.51 | 25.55 | 21.26 | 31.88 | 2.92 |
| 6.00       | 37.37       | 11.98 | 34.77 | 35.47 | 30.30 | 36.39 | 31.05 | 3.94 | 55.45     | 21.97 | 48.31 | 24.50 | 22.53 | 49.92 | 37.11 | 6.39 | 33.37 | 34.09 | 38.23 | 37.09 | 21.47 | 21.21 | 30.91 | 3.12 |
| 7.00       | 37.81       | 11.13 | 41.04 | 33.57 | 30.72 | 36.64 | 31.82 | 4.38 | 49.58     | 19.73 | 43.81 | 22.33 | 21.57 | 46.99 | 34.00 | 5.78 | 34.27 | 33.00 | 37.47 | 35.82 | 21.27 | 19.37 | 30.20 | 3.19 |
| 8.00       | 37.70       | 11.27 | 44.95 | 29.84 | 34.84 | 38.35 | 32.82 | 4.76 | 45.39     | 16.94 | 41.07 | 19.97 | 20.67 | 41.15 | 30.87 | 5.28 | 30.14 | 29.71 | 36.19 | 43.96 |       | 17.56 | 31.51 | 4.34 |
| 9.00       | 36.28       | 10.37 | 47.83 | 26.15 | 32.22 | 38.21 | 31.84 | 5.19 | 42.95     | 14.93 | 36.28 | 19.00 | 20.14 | 28.02 | 26.89 | 4.47 | 24.66 | 27.06 | 34.36 | 48.75 | 13.18 | 17.12 | 27.52 | 5.23 |
| 10.00      | 33.95       | 10.35 | 51.16 | 22.96 | 33.13 | 36.43 | 31.33 | 5.60 | 37.56     | 15.98 | 34.64 | 15.22 | 18.56 | 21.14 | 23.85 | 3.98 | 19.28 | 23.34 | 32.50 | 51.95 | 18.31 | 16.57 | 26.99 | 5.51 |
| 11.00      | 34.96       | 4.99  | 50.60 | 21.44 | 42.04 | 34.77 | 31.47 | 6.59 | 33.13     | 26.39 | 31.59 | 12.98 | 16.86 | 18.06 | 23.17 | 3.42 | 20.92 | 20.90 | 31.13 | 55.29 | 28.12 | 16.97 | 28.89 | 5.69 |
| 12.00      | 42.27       | 4.23  | 49.84 | 18.82 | 50.71 | 33.66 | 33.25 | 7.55 | 29.48     | 38.64 | 26.45 | 12.79 | 15.61 | 16.37 | 23.22 | 4.09 | 20.91 | 19.03 | 28.67 | 54.38 | 37.55 | 16.97 | 29.59 | 5.85 |
| 13.00      | 48.11       | 15.79 | 48.92 | 16.77 | 52.49 | 32.71 | 35.80 | 6.77 | 27.79     | 43.72 | 29.94 | 12.13 | 15.34 | 16.46 | 24.23 | 4.87 | 21.35 | 16.75 | 25.76 | 52.73 | 42.58 | 19.58 | 29.79 | 5.92 |
| 14.00      | 52.77       | 15.17 | 47.70 | 17.00 | 53.00 | 31.22 | 36.14 | 7.13 | 27.43     | 43.45 | 29.47 | 13.05 | 15.05 | 17.15 | 24.27 | 4.71 | 20.22 | 15.68 | 22.77 | 50.74 | 47.44 | 20.54 | 29.56 | 6.26 |
| 15.00      | 53.60       | 15.29 | 46.45 | 16.94 | 52.22 | 30.33 | 35.80 | 7.09 | 26.42     | 40.62 | 27.80 | 12.80 | 14.18 | 17.06 | 23.15 | 4.33 | 18.94 | 16.59 | 20.94 | 49.10 | 50.41 | 20.84 | 29.47 | 6.45 |
| 20.00      | 53.26       | 15.90 | 41.83 | 21.42 | 46.17 | 24.23 | 33.80 | 6.22 | 21.10     | 33.08 | 20.35 | 11.18 | 11.35 | 19.93 | 19.50 | 3.28 | 17.15 | 25.22 | 16.64 | 49.50 | 44.22 | 20.15 | 28.81 | 5.88 |
| 25.00      | 51.51       | 16.88 | 36.98 | 19.60 | 41.97 | 16.88 | 30.64 | 6.07 | 19.15     | 32.51 | 13.44 | 11.32 | 7.33  | 16.65 | 16.73 | 3.57 | 15.75 | 22.27 | 16.18 | 51.68 | 46.19 | 17.33 | 28.23 | 6.65 |
| 30.00      | 50.11       | 16.79 | 33.01 | 17.32 | 42.30 | 14.58 | 29.02 | 6.14 | 16.96     | 34.92 | 15.22 | 11.11 | 5.89  | 15.62 | 16.62 | 4.01 | 15.22 | 20.25 | 16.15 | 52.25 | 44.65 | 13.43 | 26.99 | 6.92 |

BV, before ventilation; SEM, standard error of the mean; SI, sustained inflation
