# Supplementary material for: Single Sustained Inflation followed by Ventilation Leads to Rapid Cardiorespiratory Recovery but Causes Cerebral Vascular Leakage in Asphyxiated Near-Term Lambs
Source: PubMed Central journal article supplement (PMC4713062; doi:10.1371/journal.pone.0146574), 2016-01-14
Supplement: pone.0146574.s002.pdf [file pone.0146574.s002.pdf]

Table S2. Mean systolic carotid blood flow (mL/kg/min) of individual animals in multiple SI, single SI and no SI groups from onset of ventilation.

| time (min) | multiple SI |       |       |       |       |       |       |      | single SI |       |       |       |       |       |       |       | no SI |       |       |       |       |       |       |      |
|------------|-------------|-------|-------|-------|-------|-------|-------|------|-----------|-------|-------|-------|-------|-------|-------|-------|-------|-------|-------|-------|-------|-------|-------|------|
|            | 1           | 2     | 3     | 4     | 5     | 6     | mean  | SEM  | 1         | 2     | 3     | 4     | 5     | 6     | mean  | SEM   | 1     | 2     | 3     | 4     | 5     | 6     | mean  | SEM  |
| BV         | 35.40       | 11.44 | 21.46 | 5.74  | 44.31 | 13.50 | 22.08 | 7.50 | 39.07     | 27.16 | 47.55 | 18.02 | 16.08 | 16.73 | 27.43 | 5.39  | 15.40 | 6.73  | 16.87 | 55.75 | 35.58 | 15.88 | 24.37 | 7.37 |
| 0.00       | 35.26       | 9.92  | 18.17 | 5.08  | 43.18 | 12.78 | 21.24 | 7.55 | 44.06     | 28.30 | 44.11 | 16.01 | 18.96 | 19.96 | 28.56 | 5.18  | 14.08 | 6.43  | 15.91 | 53.92 | 32.34 | 19.07 | 23.63 | 6.98 |
| 0.30       | 37.19       | 9.86  | 18.57 | 3.08  | 39.87 | 17.45 | 21.49 | 7.33 | 64.31     |       | 67.17 | 24.54 |       | 27.70 | 45.93 | 11.47 | 12.75 | 5.91  | 15.04 | 52.83 | 25.00 |       | 22.31 | 8.22 |
| 1.00       | 35.43       | 18.42 | 28.46 | 5.36  | 41.84 | 18.05 | 23.82 | 6.57 | 62.36     | 39.81 | 62.73 | 23.45 | 27.36 | 42.25 | 42.99 | 6.84  | 36.67 | 9.30  | 28.69 | 52.23 | 21.26 | 23.24 | 28.56 | 6.00 |
| 1.30       | 37.03       | 18.19 | 29.43 | 24.67 | 42.92 | 18.95 | 28.35 | 4.96 | 61.50     | 39.72 | 74.62 | 24.28 | 28.44 | 47.33 | 45.98 | 7.92  | 29.56 | 25.21 | 33.74 | 52.82 | 15.44 | 24.28 | 30.17 | 5.17 |
| 2.00       | 39.92       | 18.86 | 30.25 | 29.07 | 46.14 | 19.47 | 30.69 | 5.44 | 65.35     | 35.80 | 83.20 | 26.57 | 30.14 | 43.84 | 47.48 | 9.10  |       | 28.96 | 32.24 | 54.65 |       | 23.44 | 34.82 | 6.13 |
| 2.30       | 41.38       | 18.57 | 30.45 | 27.69 | 37.38 | 22.14 | 29.43 | 4.36 | 57.93     | 36.93 | 81.02 | 31.00 | 30.88 | 45.05 | 47.14 | 7.95  |       | 35.14 | 33.43 |       | 40.77 | 22.98 | 33.08 | 3.71 |
| 3.00       | 43.28       | 18.28 | 30.26 | 34.53 | 38.29 | 24.31 | 31.74 | 4.58 | 59.82     | 33.04 | 75.11 | 35.64 | 29.43 | 49.07 | 47.02 | 7.28  |       | 37.26 | 36.72 | 57.64 | 42.05 | 22.72 | 39.28 | 5.61 |
| 3.30       | 43.05       | 18.49 | 30.56 | 34.02 | 38.92 | 26.33 | 32.16 | 4.41 | 63.02     | 31.30 | 75.45 | 36.78 | 28.78 | 52.03 | 47.89 | 7.68  |       | 41.86 | 41.07 | 57.54 | 41.01 | 22.67 | 40.83 | 5.52 |
| 4.00       | 42.79       | 18.11 | 30.33 | 35.34 | 38.63 | 29.51 | 32.88 | 4.28 | 64.29     | 29.76 | 70.88 | 36.43 | 27.78 | 51.92 | 46.84 | 7.47  |       | 43.27 | 41.31 | 58.05 | 40.31 | 22.84 | 41.15 | 5.60 |
| 4.30       | 42.34       | 17.75 | 29.86 | 36.92 | 38.37 | 31.91 | 33.46 | 4.27 | 64.27     | 28.31 | 71.19 | 36.54 | 26.92 | 51.30 | 46.42 | 7.66  |       | 42.70 | 41.05 | 57.77 | 39.11 | 23.16 | 40.76 | 5.50 |
| 5.00       | 42.77       | 17.39 | 29.62 | 37.67 | 38.60 | 33.90 | 34.07 | 4.40 | 63.38     | 27.57 | 69.28 | 36.09 | 26.70 | 52.43 | 45.91 | 7.52  |       | 42.23 | 40.37 | 56.25 | 37.78 | 22.26 | 39.78 | 5.42 |
| 6.00       | 42.76       | 16.84 | 28.80 | 38.15 | 38.98 | 37.38 | 34.82 | 4.59 | 59.28     | 25.60 | 64.89 | 34.59 | 24.68 | 50.53 | 43.26 | 7.09  |       | 41.51 | 39.29 | 53.33 | 34.58 | 21.05 | 37.95 | 5.23 |
| 7.00       | 41.79       | 16.37 | 28.27 | 36.32 | 39.32 | 36.29 | 34.02 | 4.53 | 54.42     | 24.26 | 63.81 | 32.82 | 23.81 | 49.11 | 41.37 | 6.85  | 38.33 | 40.62 | 49.58 | 49.64 | 38.22 |       | 43.28 | 2.62 |
| 8.00       | 41.39       | 15.88 | 27.57 | 31.86 | 40.64 | 37.63 | 33.48 | 4.71 | 50.82     | 22.42 | 61.86 | 30.61 | 23.18 | 43.99 | 38.81 | 6.54  | 36.26 | 37.68 | 37.16 | 54.58 |       |       | 41.42 | 3.93 |
| 9.00       | 39.81       | 15.11 | 26.34 | 28.29 | 40.35 | 37.81 | 32.28 | 4.81 | 50.38     | 20.94 | 60.39 | 29.18 | 22.41 | 32.57 | 35.98 | 6.51  | 30.71 | 36.17 | 35.57 | 55.96 | 27.61 |       | 37.20 | 4.95 |
| 10.00      | 37.99       | 14.71 | 26.00 | 25.41 | 41.01 | 36.28 | 31.08 | 4.87 | 46.18     | 23.62 | 50.63 | 25.20 | 21.01 | 24.65 | 31.88 | 5.29  | 26.23 | 34.25 | 34.65 | 56.82 | 28.27 |       | 36.04 | 5.45 |
| 11.00      | 39.32       | 10.10 | 22.61 | 23.21 | 49.83 | 35.22 | 31.53 | 6.85 | 41.78     | 32.84 | 42.43 | 22.63 | 20.01 | 21.61 | 30.22 | 4.19  | 29.27 | 31.46 | 33.37 | 59.42 | 37.23 |       | 38.15 | 5.48 |
| 12.00      | 46.85       | 8.41  | 17.68 | 20.47 | 55.38 | 35.24 | 33.27 | 8.54 | 37.12     | 45.10 | 34.93 | 21.33 | 18.75 | 19.66 | 29.48 | 4.51  | 27.94 | 28.98 | 30.79 | 58.76 | 43.67 |       | 38.03 | 5.91 |
| 13.00      | 52.36       | 19.14 | 33.46 | 18.52 | 54.75 | 34.02 | 35.76 | 7.79 | 35.80     | 50.73 | 36.75 | 19.85 | 18.55 | 20.17 | 30.31 | 5.29  | 29.53 | 26.43 | 28.47 | 57.71 | 48.83 |       | 38.19 | 6.33 |
| 14.00      | 54.73       | 18.76 | 31.71 | 18.52 | 54.26 | 33.46 | 35.95 | 8.04 | 34.49     | 46.90 | 36.09 | 20.12 | 18.42 | 19.55 | 29.26 | 4.76  | 27.21 | 24.85 | 26.28 | 56.15 |       |       | 33.62 | 7.53 |
| 15.00      | 55.15       | 18.41 | 30.96 | 18.22 | 52.90 | 32.54 | 35.44 | 8.03 | 34.75     | 44.84 | 32.79 | 20.08 | 18.70 | 20.38 | 28.59 | 4.31  | 26.59 | 25.73 | 23.94 | 53.81 | 51.42 |       | 36.30 | 6.69 |
| 20.00      | 52.98       | 17.57 | 27.98 | 23.00 | 47.61 | 26.47 | 33.53 | 7.04 | 26.95     | 35.36 | 24.89 | 18.12 | 15.81 | 23.80 | 24.15 | 2.83  | 24.99 | 32.09 | 19.87 | 52.79 | 45.66 | 21.93 | 32.89 | 5.51 |
| 25.00      | 51.85       | 17.89 | 28.34 | 21.33 | 44.88 | 18.84 | 30.96 | 7.21 | 25.69     | 37.97 | 25.07 | 18.14 | 10.25 | 20.76 | 22.98 | 3.77  | 22.37 | 27.76 | 17.73 | 55.52 | 48.03 | 20.41 | 31.97 | 6.48 |
| 30.00      | 51.29       | 17.87 | 28.68 | 19.51 | 45.16 | 16.05 | 29.98 | 7.53 | 22.05     | 44.13 | 22.94 | 21.33 | 7.88  | 21.05 | 23.23 | 4.77  | 20.90 | 25.73 | 17.83 | 57.32 | 46.05 | 16.56 | 30.73 | 6.91 |

BV, before ventilation; SEM, standard error of the mean; SI, sustained inflation
