# Supplementary material for: Single Sustained Inflation followed by Ventilation Leads to Rapid Cardiorespiratory Recovery but Causes Cerebral Vascular Leakage in Asphyxiated Near-Term Lambs
Source: PubMed Central journal article supplement (PMC4713062; doi:10.1371/journal.pone.0146574), 2016-01-14
Supplement: pone.0146574.s003.pdf [file pone.0146574.s003.pdf]

Table S3. Mean diastolic carotid blood flow (mL/kg/min) of individual animals in multiple SI, single SI and no SI groups from onset of ventilation.

| time (min) | multiple SI |       |       |       |       |       |       |      | single SI |       |       |       |       |       |       |      | no SI |       |       |       |       |       |       |      |
|------------|-------------|-------|-------|-------|-------|-------|-------|------|-----------|-------|-------|-------|-------|-------|-------|------|-------|-------|-------|-------|-------|-------|-------|------|
|            | 1           | 2     | 3     | 4     | 5     | 6     | mean  | SEM  | 1         | 2     | 3     | 4     | 5     | 6     | mean  | SEM  | 1     | 2     | 3     | 4     | 5     | 6     | mean  | SEM  |
| BV         | 15.77       | 3.68  | 9.45  | 0.70  | 17.07 | 6.60  | 8.76  | 3.27 | 5.16      | 7.65  |       |       | 1.44  | 1.43  | 3.92  | 1.24 | 5.17  | 2.13  | 7.28  | 21.65 | 14.90 | 7.18  | 9.72  | 2.94 |
| 0.00       | 15.72       | 2.34  | 12.17 | 1.04  | 15.92 | 5.99  | 8.20  | 3.21 | 6.87      | 8.77  |       |       | 3.04  | 3.30  | 5.50  | 1.14 | 4.77  | 2.29  | 6.33  | 19.77 | 12.93 | 7.96  | 9.01  | 2.60 |
| 0.30       | 12.40       | 1.65  | 5.85  | 0.72  | 14.44 | 8.08  | 7.46  | 2.76 | 16.63     |       |       | 0.71  |       | 3.66  | 7.00  | 4.24 | 3.84  | 1.74  | 5.80  | 20.24 | 9.64  |       | 8.25  | 3.27 |
| 1.00       | 10.64       | 8.06  | 4.86  | 1.46  | 14.21 | 7.85  | 8.44  | 2.09 | 16.79     | 20.62 |       | 1.66  | 6.15  | 9.51  | 10.94 | 3.16 | 10.98 | 3.15  | 14.99 | 19.61 | 7.11  | 8.87  | 10.79 | 2.39 |
| 1.30       | 11.16       | 6.88  | 5.68  | 6.57  | 15.43 | 8.70  | 9.75  | 1.64 | 22.08     | 26.66 | 7.49  | 4.18  | 7.24  | 11.54 | 13.20 | 3.71 | 8.63  | 8.63  | 16.29 | 20.81 | 3.92  | 9.55  | 11.31 | 2.50 |
| 2.00       | 12.47       | 7.32  | 5.56  | 3.27  | 16.77 | 9.94  | 9.95  | 2.28 | 33.24     | 25.78 | 16.52 | 7.26  | 8.15  | 18.01 | 18.16 | 4.11 |       | 8.53  | 14.82 | 27.81 |       | 8.21  | 14.84 | 4.10 |
| 2.30       | 14.65       | 6.31  | 6.34  | 5.91  | 12.88 | 13.81 | 10.71 | 1.90 | 31.42     | 27.50 | 23.31 | 12.32 | 9.74  | 26.05 | 21.73 | 3.56 |       | 11.33 | 17.49 |       | 15.17 | 8.32  | 13.08 | 2.03 |
| 3.00       | 15.66       | 6.80  | 7.28  | 14.73 | 13.16 | 17.09 | 13.49 | 1.79 | 36.43     | 24.21 | 27.76 | 18.18 | 9.70  | 33.58 | 24.98 | 4.05 |       | 12.62 | 24.00 | 27.22 | 14.46 | 8.46  | 17.35 | 3.55 |
| 3.30       | 16.51       | 6.33  | 8.53  | 20.63 | 13.65 | 19.85 | 15.39 | 2.59 | 44.22     | 24.07 | 38.95 | 20.58 | 7.72  | 41.21 | 29.46 | 5.85 |       | 11.24 | 28.78 | 19.19 | 19.16 | 9.18  | 17.51 | 3.47 |
| 4.00       | 18.57       | 6.04  | 10.80 | 23.21 | 13.58 | 23.53 | 16.99 | 3.28 | 42.22     | 20.49 | 38.19 | 17.14 | 12.06 | 37.36 | 27.91 | 5.23 |       | 16.49 | 31.00 | 26.25 | 12.73 | 11.32 | 19.56 | 3.87 |
| 4.30       | 20.14       | 5.85  | 12.58 | 24.94 | 13.44 | 25.98 | 18.07 | 3.77 | 42.74     | 18.70 | 38.86 | 15.62 | 14.15 | 35.21 | 27.55 | 5.22 |       | 17.49 | 31.62 | 26.09 | 11.25 | 13.73 | 20.04 | 3.84 |
| 5.00       | 20.71       | 5.67  | 12.81 | 25.82 | 13.67 | 27.79 | 18.73 | 4.08 | 42.13     | 17.48 | 34.40 | 14.40 | 15.30 | 36.74 | 26.74 | 5.05 |       | 19.02 | 30.89 | 24.24 | 9.82  | 15.40 | 19.87 | 3.62 |
| 6.00       | 22.65       | 5.32  | 15.91 | 26.19 | 14.71 | 30.26 | 19.83 | 4.44 | 36.96     | 14.16 | 28.61 | 12.55 | 15.32 | 32.77 | 23.39 | 4.35 |       | 19.33 | 29.06 | 23.71 | 7.38  | 16.21 | 19.14 | 3.65 |
| 7.00       | 22.86       | 4.96  | 17.40 | 24.14 | 15.38 | 28.91 | 19.25 | 4.18 | 32.18     | 12.30 | 25.15 | 11.25 | 14.69 | 29.25 | 20.80 | 3.74 | 22.26 | 17.96 | 27.62 | 24.29 | 6.67  |       | 19.76 | 3.63 |
| 8.00       | 23.70       | 5.25  | 18.45 | 20.59 | 18.28 | 29.12 | 19.39 | 3.97 | 27.83     | 9.85  | 20.02 | 10.05 | 13.72 | 23.92 | 17.57 | 3.07 | 18.82 | 13.66 | 25.89 | 30.85 |       |       | 22.30 | 3.39 |
| 9.00       | 22.60       | 4.52  | 17.27 | 18.07 | 17.98 | 27.21 | 18.08 | 3.79 | 26.90     | 8.48  | 11.05 | 8.78  | 12.73 | 15.18 | 13.85 | 2.80 | 13.42 | 12.27 | 24.39 | 37.46 | 2.95  |       | 18.10 | 5.91 |
| 10.00      | 21.14       | 4.24  | 15.10 | 15.93 | 19.04 | 25.90 | 17.25 | 3.63 | 21.54     | 8.21  | 12.16 | 6.17  | 11.71 | 8.97  | 11.46 | 2.21 | 9.17  | 9.88  | 22.47 | 40.58 | 3.49  |       | 17.12 | 6.64 |
| 11.00      | 21.79       |       | 17.29 | 14.76 | 27.99 | 24.18 | 17.60 | 5.06 | 16.85     | 12.04 | 13.45 | 3.46  | 9.71  | 7.53  | 10.51 | 1.92 | 11.35 | 8.03  | 21.08 | 41.35 | 12.65 |       | 18.89 | 6.01 |
| 12.00      | 24.52       |       | 21.35 | 12.35 | 36.66 | 22.75 | 19.00 | 6.37 | 13.52     | 21.82 | 10.27 | 3.75  | 9.14  | 6.78  | 10.88 | 2.57 | 11.02 | 6.78  | 18.20 | 39.36 | 21.00 |       | 19.27 | 5.62 |
| 13.00      | 30.06       | 6.61  | 23.97 | 11.02 | 36.70 | 21.50 | 21.18 | 5.64 | 13.17     | 29.31 | 16.56 | 3.59  | 8.66  | 7.49  | 13.13 | 3.73 | 11.60 | 5.53  | 15.34 | 37.53 | 28.04 |       | 19.61 | 5.80 |
| 14.00      | 33.82       | 7.29  | 28.61 | 11.72 | 35.53 | 22.42 | 22.15 | 5.68 | 12.97     | 29.89 | 15.38 | 5.04  | 8.45  | 7.17  | 13.15 | 3.69 | 9.62  | 4.60  | 12.81 | 35.73 |       |       | 15.69 | 6.89 |
| 15.00      | 33.11       | 7.64  | 30.42 | 11.69 | 35.75 | 21.84 | 22.00 | 5.59 | 13.29     | 27.74 | 13.72 | 4.30  | 8.65  | 7.72  | 12.57 | 3.36 | 8.74  | 5.19  | 10.85 | 35.55 | 33.12 |       | 18.69 | 6.46 |
| 20.00      | 31.92       | 9.41  | 32.52 | 15.50 | 31.90 | 15.75 | 20.89 | 4.64 | 10.38     | 21.70 | 5.51  | 2.57  | 3.65  | 8.55  | 8.73  | 2.86 | 6.86  | 13.15 | 8.76  | 35.28 | 27.27 | 13.29 | 17.43 | 4.61 |
| 25.00      | 32.68       | 10.78 | 30.04 | 13.85 | 29.50 | 10.52 | 19.47 | 4.81 | 9.92      | 20.14 | -6.69 | 2.89  | 1.71  | 5.83  | 5.63  | 3.67 | 5.86  | 11.11 | 8.93  | 37.40 | 28.72 | 10.00 | 17.00 | 5.25 |
| 30.00      | 32.24       | 10.62 | 28.80 | 11.45 | 28.62 | 9.55  | 18.49 | 4.91 | 7.84      | 22.73 | -1.78 | 4.52  | 0.84  | 5.40  | 6.59  | 3.51 | 5.17  | 9.30  | 10.29 | 38.85 | 28.31 | 5.98  | 16.32 | 5.68 |

BV, before ventilation; SEM, standard error of the mean; SI, sustained inflation
