# Supplementary material for: Single Sustained Inflation followed by Ventilation Leads to Rapid Cardiorespiratory Recovery but Causes Cerebral Vascular Leakage in Asphyxiated Near-Term Lambs
Source: PubMed Central journal article supplement (PMC4713062; doi:10.1371/journal.pone.0146574), 2016-01-14
Supplement: pone.0146574.s004.pdf [file pone.0146574.s004.pdf]

Table S4. peak dF/dt (mL/kg/s<sup>2</sup>) of individual animals in multiple SI, single SI and no SI groups from onset of ventilation.

| time (min) | multiple SI |        |        |        |        |       |        |       | single SI |        |        |        |        |        |        |       | no SI  |        |        |        |        |       |        |       |
|------------|-------------|--------|--------|--------|--------|-------|--------|-------|-----------|--------|--------|--------|--------|--------|--------|-------|--------|--------|--------|--------|--------|-------|--------|-------|
|            | 1           | 2      | 3      | 4      | 5      | 6     | mean   | SEM   | 1         | 2      | 3      | 4      | 5      | 6      | mean   | SEM   | 1      | 2      | 3      | 4      | 5      | 6     | mean   | SEM   |
| BV         | 39.93       | 73.43  | 36.25  | 9.71   | 70.84  | 32.82 | 45.35  | 12.03 | 83.47     | 46.52  | 119.66 | 37.63  | 32.72  | 18.73  | 56.46  | 15.45 | 23.86  | 11.88  | 20.18  | 89.54  | 62.27  | 38.40 | 45.19  | 13.91 |
| 0.00       | 40.93       | 74.13  | 37.25  | 7.76   | 70.67  | 31.11 | 44.92  | 12.46 | 97.91     | 44.95  | 115.67 | 29.95  | 41.56  | 24.08  | 59.02  | 15.59 | 20.67  | 10.80  | 16.99  | 88.18  | 54.32  | 52.55 | 45.30  | 13.73 |
| 0.30       | 57.41       | 138.12 | 53.73  | 4.53   | 63.58  | 40.90 | 60.91  | 21.86 | 197.15    | 49.65  | 437.95 | 179.94 | 101.31 | 60.37  | 171.06 | 58.84 | 20.15  | 9.79   | 16.47  | 85.46  | 42.58  | 46.89 | 40.98  | 13.08 |
| 1.00       | 54.52       | 169.45 | 50.85  | 7.35   | 77.99  | 46.05 | 71.07  | 27.10 | 187.87    | 46.89  | 396.52 | 173.41 | 109.59 | 154.84 | 178.19 | 48.40 | 62.89  | 17.85  | 59.21  | 89.70  | 35.70  | 49.38 | 51.10  | 12.19 |
| 1.30       | 57.89       | 173.51 | 54.21  | 45.97  | 92.04  | 48.01 | 83.48  | 23.98 | 159.26    | 33.69  | 342.60 | 144.67 | 111.47 | 182.77 | 162.41 | 41.78 | 62.83  | 82.63  | 59.15  | 100.01 | 46.74  | 49.96 | 68.43  | 10.10 |
| 2.00       | 68.49       | 180.81 | 64.81  | 119.38 | 86.98  | 45.86 | 100.30 | 23.45 | 142.82    | 30.79  | 298.88 | 163.05 | 110.31 | 165.54 | 151.90 | 35.77 | 58.33  | 132.52 | 54.65  | 99.66  |        | 53.56 | 86.02  | 18.64 |
| 2.30       | 79.33       | 178.85 | 75.65  | 99.48  | 68.02  | 48.38 | 94.81  | 22.58 | 134.50    | 32.39  | 259.37 | 162.46 | 101.61 | 147.38 | 139.62 | 30.49 | 39.67  | 139.89 | 35.99  | 118.53 | 76.78  | 51.95 | 85.36  | 19.17 |
| 3.00       | 89.44       | 189.69 | 85.77  | 97.27  | 72.87  | 51.87 | 100.23 | 23.68 | 128.16    | 29.68  | 225.56 | 153.54 | 96.19  | 118.93 | 125.34 | 26.39 | 28.40  | 151.21 | 24.72  | 92.63  | 86.12  | 50.94 | 81.86  | 20.92 |
| 3.30       | 86.92       | 191.31 | 83.24  | 71.43  | 72.54  | 53.79 | 95.20  | 24.60 | 124.71    | 30.58  | 227.55 | 151.16 | 90.42  | 106.55 | 121.83 | 26.83 | 26.32  | 153.93 | 22.64  | 88.91  | 86.05  | 48.11 | 80.66  | 21.77 |
| 4.00       | 91.43       | 191.89 | 87.75  | 70.95  | 72.13  | 53.96 | 96.07  | 24.68 | 122.66    | 31.16  | 227.71 | 151.28 | 82.63  | 107.30 | 120.46 | 27.10 | 18.65  | 160.82 | 14.97  | 93.68  | 83.14  | 40.75 | 79.41  | 24.53 |
| 4.30       | 87.69       | 192.79 | 84.01  | 73.37  | 72.27  | 53.13 | 95.85  | 24.85 | 119.57    | 31.89  | 232.79 | 150.16 | 76.12  | 115.34 | 120.98 | 27.89 | 115.99 | 164.62 | 112.31 | 93.93  | 78.22  | 44.69 | 99.49  | 20.00 |
| 5.00       | 90.47       | 189.27 | 86.79  | 75.04  | 71.60  | 53.16 | 95.91  | 24.08 | 120.20    | 31.90  | 245.22 | 147.76 | 70.84  | 121.07 | 122.83 | 29.77 | 110.22 | 169.25 | 106.54 | 94.24  | 74.41  | 49.38 | 99.50  | 20.19 |
| 6.00       | 85.55       | 194.92 | 81.88  | 73.85  | 69.14  | 56.71 | 96.03  | 25.15 | 134.99    | 32.08  | 253.70 | 149.99 | 60.83  | 120.02 | 125.27 | 31.66 | 126.56 | 172.11 | 122.88 | 87.59  | 80.11  | 55.63 | 104.40 | 20.41 |
| 7.00       | 84.17       | 198.88 | 80.49  | 74.41  | 68.38  | 62.09 | 97.59  | 25.58 | 135.08    | 29.95  | 248.26 | 155.09 | 57.16  | 116.03 | 123.59 | 31.57 | 108.33 | 174.31 | 104.65 | 78.10  | 83.10  | 54.15 | 99.60  | 20.57 |
| 8.00       | 83.94       | 199.54 | 80.26  | 70.58  | 64.39  | 74.13 | 98.51  | 25.45 | 129.59    | 28.58  | 261.76 | 149.71 | 57.32  | 120.92 | 124.65 | 33.28 | 118.68 | 172.45 | 115.00 | 83.06  |        | 40.97 | 103.79 | 27.86 |
| 9.00       | 84.90       | 196.71 | 81.22  | 63.63  | 63.51  | 81.26 | 98.00  | 25.07 | 128.76    | 25.88  | 251.50 | 152.34 | 57.23  | 97.73  | 118.91 | 32.51 | 97.40  | 162.82 | 93.73  | 91.46  | 64.19  | 33.05 | 89.78  | 21.53 |
| 10.00      | 88.06       | 189.16 | 84.38  | 51.18  | 62.71  | 85.28 | 95.28  | 24.47 | 135.14    | 32.16  | 257.14 | 151.43 | 51.61  | 80.24  | 117.95 | 33.65 | 74.59  | 143.11 | 70.91  | 96.07  | 67.35  | 43.58 | 84.94  | 16.79 |
| 11.00      | 88.37       | 185.06 | 84.69  | 47.47  | 67.72  | 86.56 | 95.04  | 23.70 | 140.92    | 55.78  | 194.36 | 145.84 | 54.21  | 67.11  | 109.70 | 23.98 | 106.93 | 122.74 | 103.25 | 108.18 | 87.42  | 46.33 | 94.32  | 13.25 |
| 12.00      | 113.87      | 179.66 | 110.19 | 36.61  | 92.74  | 90.02 | 102.58 | 23.10 | 128.70    | 99.20  | 126.59 | 134.20 | 46.84  | 76.12  | 101.94 | 14.23 | 94.17  | 101.20 | 90.49  | 112.92 | 87.29  | 51.37 | 89.39  | 10.41 |
| 13.00      | 141.28      | 172.23 | 137.60 | 29.68  | 108.13 | 86.98 | 107.66 | 24.30 | 124.81    | 105.19 | 92.53  | 115.69 | 47.61  | 54.82  | 90.11  | 13.09 | 114.70 | 83.07  | 111.02 | 112.82 | 101.23 | 78.75 | 98.11  | 7.42  |
| 14.00      | 142.12      |        | 138.44 | 26.42  | 109.50 | 90.94 | 92.24  | 24.36 | 120.28    | 98.98  | 86.15  | 106.38 | 46.72  | 53.95  | 85.41  | 12.01 | 99.97  | 78.30  | 96.29  | 109.89 | 108.85 | 87.88 | 96.98  | 6.12  |
| 15.00      | 138.03      | 154.26 | 134.35 | 24.38  | 105.37 | 85.41 | 101.49 | 22.74 | 129.90    | 94.64  | 84.09  | 104.20 | 44.35  | 58.88  | 86.01  | 12.66 | 101.31 | 83.48  | 97.64  | 106.78 | 101.19 | 85.46 | 95.64  | 4.68  |
| 20.00      | 124.70      | 160.63 | 121.02 | 31.90  | 102.51 | 80.08 | 99.96  | 21.59 | 94.24     | 84.69  | 68.30  | 87.31  | 42.42  | 93.22  | 78.36  | 8.14  | 103.02 | 145.14 | 99.34  | 105.76 | 104.19 | 83.71 | 108.36 | 10.03 |
| 25.00      | 128.12      | 172.40 | 124.44 | 30.68  | 101.74 | 55.87 | 97.76  | 25.26 | 79.70     | 89.88  | 97.06  | 83.82  | 24.95  | 85.41  | 76.80  | 10.65 | 103.80 | 126.04 | 100.12 | 113.72 | 107.94 | 78.50 | 106.00 | 7.83  |
| 30.00      | 128.77      | 174.66 | 125.09 | 30.97  | 95.66  | 45.91 | 95.19  | 26.45 | 67.41     | 91.03  | 85.89  | 75.74  | 21.56  | 89.01  | 71.77  | 10.68 | 97.07  | 119.55 | 93.39  | 118.62 | 104.89 | 57.00 | 99.43  | 11.42 |

BV, before ventilation; dF/dt, peak first derivative of the carotid arterial blood flow pulse; SEM, standard error of the mean; SI, sustained inflation
