# Supplementary material for: Single Sustained Inflation followed by Ventilation Leads to Rapid Cardiorespiratory Recovery but Causes Cerebral Vascular Leakage in Asphyxiated Near-Term Lambs
Source: PubMed Central journal article supplement (PMC4713062; doi:10.1371/journal.pone.0146574), 2016-01-14
Supplement: pone.0146574.s005.pdf [file pone.0146574.s005.pdf]

Table S5. Pulsatility index of individual animals in multiple SI, single SI and no SI groups from onset of ventilation.

| time (min) | multiple SI |      |      |      |      |      |      |      | single SI |      |      |      |      |      |      |      | no SI |      |      |      |      |      |      |      |      |
|------------|-------------|------|------|------|------|------|------|------|-----------|------|------|------|------|------|------|------|-------|------|------|------|------|------|------|------|------|
|            | 1           | 2    | 3    | 4    | 5    | 6    | mean | SEM  | 1         | 2    | 3    | 4    | 5    | 6    | mean | SEM  | 1     | 2    | 3    | 4    | 5    | 6    | mean | SEM  |      |
| BV         | 2.25        | 2.50 | 4.42 | 4.42 | 2.45 | 1.69 | 2.96 | 0.48 | 4.65      | 2.80 |      |      |      | 4.53 | 3.99 | 0.60 | 2.97  | 3.17 | 2.33 | 2.23 | 2.18 | 1.29 | 2.36 | 0.27 |      |
| 0.00       | 2.03        | 2.96 | 4.58 | 3.42 | 2.37 | 1.73 | 2.85 | 0.43 | 4.09      | 2.69 |      |      |      | 4.22 | 3.67 | 0.49 | 3.09  | 3.10 | 2.52 | 2.24 | 2.15 | 1.59 | 2.45 | 0.24 |      |
| 0.30       | 2.80        | 4.20 | 3.71 | 3.44 | 1.96 | 1.40 | 2.92 | 0.44 | 2.02      | 1.45 | 5.00 | 4.24 | 3.08 | 3.17 | 3.16 | 0.54 | 3.00  | 3.20 | 2.37 | 2.18 | 2.29 |      | 2.61 | 0.19 |      |
| 1.00       | 3.23        | 1.49 | 2.44 | 3.14 | 2.11 | 1.42 | 2.31 | 0.32 | 1.91      | 1.16 | 3.96 | 3.90 | 2.92 | 2.29 | 2.69 | 0.46 | 1.93  | 2.77 | 1.09 | 2.09 | 2.68 | 1.80 | 2.06 | 0.25 |      |
| 1.30       | 2.87        | 1.71 | 2.45 | 2.17 | 2.50 | 1.31 | 2.17 | 0.23 | 1.44      | 0.68 | 2.96 | 2.52 | 2.69 | 2.03 | 2.05 | 0.35 | 2.09  | 2.10 | 1.14 | 1.90 | 3.62 |      | 1.97 | 2.14 | 0.33 |
| 2.00       | 2.77        | 1.68 | 2.35 | 2.59 | 2.62 | 1.14 | 2.19 | 0.26 | 1.08      | 0.60 | 2.18 | 2.02 | 2.39 | 1.21 | 1.58 | 0.29 |       | 2.04 | 1.19 | 1.65 |      | 1.51 | 1.60 | 0.14 |      |
| 2.30       | 2.56        | 1.85 | 2.74 | 2.08 | 1.93 | 0.86 | 2.00 | 0.27 | 1.04      | 0.64 | 1.66 | 1.60 | 2.00 | 1.01 | 1.33 | 0.21 |       | 1.90 | 1.00 | 1.85 | 1.95 | 1.68 | 1.68 | 0.16 |      |
| 3.00       | 2.44        | 1.72 | 2.12 | 1.32 | 1.92 | 0.69 | 1.70 | 0.25 | 0.99      | 0.67 | 1.39 | 1.42 | 1.72 | 0.78 | 1.16 | 0.17 |       | 1.86 | 0.71 | 1.77 | 2.11 |      | 1.61 | 0.25 |      |
| 3.30       | 2.18        | 1.85 | 2.98 | 0.84 | 1.85 | 0.64 | 1.72 | 0.35 | 0.92      | 0.75 | 1.11 | 1.39 | 1.41 | 0.71 | 1.05 | 0.12 | 1.21  | 1.63 | 0.54 | 1.19 | 2.14 |      | 1.34 | 0.24 |      |
| 4.00       | 1.91        | 1.90 | 2.73 | 0.78 | 1.86 | 0.65 | 1.64 | 0.32 | 0.85      | 0.83 | 1.08 | 1.36 | 1.26 | 0.67 | 1.01 | 0.11 | 1.38  | 1.46 | 0.54 | 1.22 | 2.16 | 0.81 | 1.26 | 0.23 |      |
| 4.30       | 1.75        | 1.92 | 3.16 | 0.74 | 1.91 | 0.63 | 1.68 | 0.38 | 0.79      | 0.92 | 1.05 | 1.36 | 1.04 | 0.74 | 0.98 | 0.09 | 1.06  | 1.37 | 0.55 | 1.26 | 2.32 | 0.66 | 1.20 | 0.26 |      |
| 5.00       | 1.71        | 1.96 | 4.12 | 0.70 | 1.85 | 0.61 | 1.83 | 0.52 | 0.74      | 0.99 | 1.11 | 1.42 | 1.02 | 0.76 | 1.01 | 0.10 | 1.51  | 1.26 | 0.55 | 1.30 | 2.43 | 1.24 | 1.38 | 0.25 |      |
| 6.00       | 1.43        | 1.99 | 2.14 | 0.65 | 1.78 | 0.58 | 1.43 | 0.27 | 0.86      | 1.21 | 1.37 | 1.61 | 0.89 | 0.89 | 1.14 | 0.13 | 1.27  | 1.28 | 0.54 | 1.25 | 2.70 |      | 1.41 | 0.32 |      |
| 7.00       | 1.29        | 2.13 | 1.55 | 0.71 | 1.73 | 0.57 | 1.33 | 0.24 | 0.97      | 1.38 | 1.54 | 1.88 | 0.89 | 1.00 | 1.28 | 0.16 | 1.04  | 1.34 | 0.61 | 1.10 | 3.08 | 0.71 | 1.31 | 0.37 |      |
| 8.00       | 1.24        | 1.99 | 1.29 | 0.80 | 1.46 | 0.57 | 1.22 | 0.20 | 1.02      | 1.61 | 1.72 | 2.13 | 0.95 | 1.15 | 1.43 | 0.19 | 1.22  | 1.52 | 0.62 | 0.84 |      | 0.58 | 0.96 | 0.17 |      |
| 9.00       | 1.24        | 2.15 | 1.20 | 0.87 | 1.53 | 0.62 | 1.27 | 0.22 | 1.07      | 1.79 | 1.96 | 2.32 | 1.06 | 1.36 | 1.59 | 0.21 | 1.47  | 1.61 | 0.66 | 0.67 | 3.88 | 0.63 | 1.49 | 0.51 |      |
| 10.00      | 1.28        | 2.16 |      | 0.89 | 1.41 | 0.69 | 1.27 | 0.21 | 1.30      | 2.02 | 2.13 | 2.86 | 1.12 | 1.53 | 1.83 | 0.26 | 1.58  | 1.79 | 0.69 | 0.66 | 2.77 | 0.68 | 1.36 | 0.35 |      |
| 11.00      | 1.25        | 4.72 | 1.18 | 0.97 | 1.04 | 0.79 | 1.75 | 0.68 | 1.58      | 1.62 | 2.02 | 3.27 | 1.74 | 1.65 | 1.98 | 0.27 | 1.70  | 2.25 | 0.79 | 0.70 | 1.80 | 0.91 | 1.36 | 0.26 |      |
| 12.00      | 1.20        | 4.56 |      | 0.97 | 0.78 | 0.86 | 1.67 | 0.66 | 1.67      | 1.23 | 1.94 | 3.20 | 1.77 | 1.65 | 1.91 | 0.28 | 1.63  | 2.35 | 0.88 | 0.73 | 1.29 | 1.06 | 1.32 | 0.24 |      |
| 13.00      | 1.16        | 1.79 |      | 1.07 | 0.80 | 0.82 | 1.13 | 0.16 | 1.87      | 1.00 | 1.39 | 3.17 | 1.81 | 1.50 | 1.79 | 0.30 | 1.72  | 2.55 | 1.04 | 0.76 | 1.19 | 1.18 | 1.41 | 0.26 |      |
| 14.00      | 1.01        | 1.70 |      | 0.93 | 0.75 | 0.94 | 1.07 | 0.15 | 1.67      | 0.80 | 1.43 | 2.78 | 1.75 | 1.49 | 1.65 | 0.26 | 1.78  | 2.62 | 1.23 | 0.78 | 1.02 | 1.05 | 1.41 | 0.28 |      |
| 15.00      | 0.93        | 1.64 |      | 0.93 | 0.71 | 0.86 | 1.01 | 0.15 | 1.86      | 0.86 | 1.39 | 2.88 | 1.82 | 1.50 | 1.72 | 0.28 | 1.90  | 2.50 | 1.27 | 0.76 | 0.92 | 0.97 | 1.39 | 0.28 |      |
| 20.00      | 0.78        | 1.30 |      | 0.87 | 0.76 | 1.02 | 0.95 | 0.09 | 1.76      | 0.87 |      | 3.10 | 2.24 | 1.68 | 1.93 | 0.37 | 2.11  | 1.54 | 1.36 | 0.77 | 0.88 | 0.97 | 1.27 | 0.21 |      |
| 25.00      | 0.86        | 1.23 |      | 0.93 | 0.90 | 1.16 | 1.02 | 0.07 | 1.71      | 1.12 |      | 2.96 | 2.22 | 1.91 | 1.98 | 0.30 | 2.11  | 1.57 | 1.12 | 0.81 | 0.90 | 1.25 | 1.29 | 0.20 |      |
| 30.00      | 0.90        | 1.28 |      | 1.05 | 0.83 | 1.09 | 1.03 | 0.07 | 1.84      | 1.28 |      | 2.93 | 2.11 | 2.08 | 2.05 | 0.27 | 2.07  | 1.68 | 1.04 | 0.84 | 0.95 | 1.65 | 1.37 | 0.20 |      |

BV, before ventilation; SEM, standard error of the mean; SI, sustained inflation
