# Supplementary material for: Single Sustained Inflation followed by Ventilation Leads to Rapid Cardiorespiratory Recovery but Causes Cerebral Vascular Leakage in Asphyxiated Near-Term Lambs
Source: PubMed Central journal article supplement (PMC4713062; doi:10.1371/journal.pone.0146574), 2016-01-14
Supplement: pone.0146574.s006.pdf [file pone.0146574.s006.pdf]

Table S6. Cerebral oxygen delivery (dL/min/kg) of individual animals in multiple SI, single SI and no SI groups from onset of ventilation.

| time (min) | multiple SI |      |      |      |      |      |      |      | single SI |      |      |      |      |      |      |      | no SI |      |      |      |      |      |      |      |
|------------|-------------|------|------|------|------|------|------|------|-----------|------|------|------|------|------|------|------|-------|------|------|------|------|------|------|------|
|            | 1           | 2    | 3    | 4    | 5    | 6    | mean | SEM  | 1         | 2    | 3    | 4    | 5    | 6    | mean | SEM  | 1     | 2    | 3    | 4    | 5    | 6    | mean | SEM  |
| BV         | 0.43        | 0.03 | 0.35 | 0.02 | 0.40 | 0.12 | 0.22 | 0.08 | 0.18      | 0.24 | 0.17 | 0.17 | 0.09 | 0.09 | 0.16 | 0.02 | 0.13  | 0.10 | 0.03 | 0.78 | 0.12 | 0.08 | 0.21 | 0.11 |
| 1.00       | 0.34        | 0.25 |      | 0.13 | 0.37 | 0.51 | 0.32 | 0.06 | 4.91      | 1.35 | 0.63 | 0.19 | 1.65 | 3.55 | 2.05 | 0.74 | 1.23  | 0.46 | 0.72 | 0.49 | 0.14 | 0.84 | 0.65 | 0.15 |
| 2.30       | 0.55        | 0.19 | 3.18 | 1.52 | 0.43 | 0.84 | 1.12 | 0.45 | 7.88      | 0.76 | 7.93 | 1.83 | 2.35 | 5.95 | 4.45 | 1.30 | 2.22  | 2.70 | 1.84 | 0.62 | 0.39 | 0.49 | 1.38 | 0.41 |
| 5.00       | 0.82        | 0.22 | 0.95 | 5.24 | 0.50 | 3.71 | 1.91 | 0.84 | 11.54     | 0.45 | 9.09 | 4.23 | 3.27 | 5.47 | 5.68 | 1.65 | 5.38  | 5.65 | 4.66 | 0.45 | 0.46 | 0.78 | 2.90 | 1.05 |
| 7.30       | 0.58        | 0.19 | 5.94 | 5.09 | 0.59 | 6.69 | 3.18 | 1.24 | 9.30      | 0.39 | 7.25 | 3.18 |      | 6.69 | 5.36 | 1.59 | 5.83  | 5.31 | 5.81 | 0.63 | 0.26 | 1.25 | 3.18 | 1.11 |
| 10.00      | 0.68        | 0.19 |      | 3.09 | 0.62 | 7.08 | 2.33 | 1.29 | 7.46      | 0.45 | 5.00 | 2.40 | 2.76 | 3.13 | 3.53 | 0.98 | 3.36  | 3.92 | 5.43 | 1.66 | 0.37 | 2.55 | 2.88 | 0.72 |
| 15.00      | 1.85        | 0.55 | 7.67 | 2.70 | 2.63 | 5.86 | 3.54 | 1.09 | 5.16      | 6.63 | 4.49 | 1.99 |      | 2.44 | 4.14 | 0.86 | 2.39  | 2.68 | 0.10 | 2.35 | 1.47 | 4.10 | 2.60 | 0.43 |
| 20.00      | 3.85        | 1.19 | 4.76 | 2.68 | 2.39 | 4.39 | 3.21 | 0.55 | 4.18      | 5.10 | 3.28 | 1.52 | 1.50 | 2.79 | 3.06 | 0.59 | 2.93  | 4.00 | 2.54 | 1.99 | 1.68 | 3.95 | 2.85 | 0.40 |
| 30.00      | 2.70        | 2.17 | 4.39 | 2.49 | 2.45 | 2.77 | 2.83 | 0.32 | 3.16      | 2.32 | 2.56 | 1.50 | 0.75 | 2.30 | 2.10 | 0.35 | 2.65  | 3.29 | 2.44 | 1.67 | 1.36 | 2.28 | 2.28 | 0.28 |

BV, before ventilation; SEM, standard error of the mean; SI, sustained inflation
